# Supplementary material for: Jinlida for Diabetes Prevention in Impaired Glucose Tolerance and Multiple Metabolic Abnormalities: The FOCUS Randomized Clinical Trial
Source: PubMed Central journal article supplement (PMC11148787; doi:10.1001/jamainternmed.2024.1190), 2024-06-03
Supplement: jamainternmed-e241190-s003.pdf [file jamainternmed-e241190-s003.pdf]

\*First name, last name, and suffix (if applicable) are required and will appear in PubMed.

| <b>*Group Name(s): FOCUS Trial Committees Investigators</b> |                   |                              |                  |                                                                                                  |                                          |                                                         |                                                                                            |
|-------------------------------------------------------------|-------------------|------------------------------|------------------|--------------------------------------------------------------------------------------------------|------------------------------------------|---------------------------------------------------------|--------------------------------------------------------------------------------------------|
| <b>*First Name and Middle Initial(s)</b>                    | <b>*Last Name</b> | <b>*Suffix (eg, Jr, III)</b> | Academic Degrees | Institution                                                                                      | Location (city, state/province, country) | Role or Contribution, eg, chair, principal investigator | Group (if more than 1 Group listed in the byline) and/or Subgroup (eg, Steering Committee) |
| Liyang                                                      | Lun               |                              | MB               | Department of endocrinology, Hebei Yiling Hospital                                               | Shijiazhuang, China                      | Data collection                                         |                                                                                            |
| Sulin                                                       | Hu                |                              | MB               | Department of endocrinology, Hebei Yiling Hospital                                               | Shijiazhuang, China                      | Data collection                                         |                                                                                            |
| Haipeng                                                     | Liu               |                              | MB               | Department of endocrinology, Second Affiliated Hospital of Yunnan University of Chinese Medicine | Kunming, China                           | Data collection                                         |                                                                                            |
| Guangyu                                                     | Cai               |                              | MB               | Department of endocrinology, Second Affiliated Hospital of Yunnan University of Chinese Medicine | Kunming, China                           | Data collection                                         |                                                                                            |
| Huan                                                        | Li                |                              | MB               | Department of endocrinology, Second Affiliated Hospital of Yunnan University of Chinese Medicine | Kunming, China                           | Data collection                                         |                                                                                            |
| Ling                                                        | Huang             |                              | MB               | Department of endocrinology, Second Affiliated Hospital of Yunnan University of Chinese Medicine | Kunming, China                           | Data collection                                         |                                                                                            |
| Mengling                                                    | Tian              |                              | MB               | Department of endocrinology, Second Affiliated Hospital of Yunnan University of Chinese Medicine | Kunming, China                           | Data collection                                         |                                                                                            |
| Jiale                                                       | Wan               |                              | MB               | Department of endocrinology, Baoji Second People's Hospital                                      | Baoji, China                             | Data collection                                         |                                                                                            |
| Peizhen                                                     | Song              |                              | MB               | Department of endocrinology, Baoji Second People's Hospital                                      | Baoji, China                             | Data collection                                         |                                                                                            |
| Yaqin                                                       | Zhang             |                              | MB               | Department of endocrinology, Baoji Second People's Hospital                                      | Baoji, China                             | Data collection                                         |                                                                                            |

## Supplemental Online Content: Nonauthor Collaborators

\*First name, last name, and suffix (if applicable) are required and will appear in PubMed.

| *First Name and Middle Initial(s) | *Last Name | *Suffix (eg, Jr, III) | Academic Degrees | Institution                                                                                                                            | Location (city, state/province, country) | Role or Contribution, eg, chair, principal investigator | Group (if more than 1 Group listed in the byline) and/or Subgroup (eg, Steering Committee) |
|-----------------------------------|------------|-----------------------|------------------|----------------------------------------------------------------------------------------------------------------------------------------|------------------------------------------|---------------------------------------------------------|--------------------------------------------------------------------------------------------|
| Fan                               | Li         |                       | MB               | Department of endocrinology, Baoji Second People's Hospital                                                                            | Baoji, China                             | Data collection                                         |                                                                                            |
| Xiaoyan                           | Hu         |                       | MB               | Department of endocrinology, Baoji Second People's Hospital                                                                            | Baoji, China                             | Data collection                                         |                                                                                            |
| Jing                              | Xu         |                       | M.M              | Department of Geriatric Internal Medicine II (Endocrinology and Metabolism) The First Affiliated Hospital of Xi'an Jiaotong University | Xi'an, China                             | Data collection                                         |                                                                                            |
| Ying                              | Pang       |                       | MB               | Department of Geriatric Internal Medicine II (Endocrinology and Metabolism) The First Affiliated Hospital of Xi'an Jiaotong University | Xi'an, China                             | Data collection                                         |                                                                                            |
| Jing                              | Shi        |                       | M.D.             | Department of Geriatric Internal Medicine II (Endocrinology and Metabolism) The First Affiliated Hospital of Xi'an Jiaotong University | Xi'an, China                             | Data collection                                         |                                                                                            |
| Hongwei                           | Cheng      |                       | M.M              | Department of endocrinology, Shaanxi Provincial Hospital of Chinese Medicine                                                           | Xi'an, China                             | Data collection                                         |                                                                                            |
| Wenhong                           | Tian       |                       | M.M              | Department of endocrinology, Shaanxi Provincial Hospital of Chinese Medicine.                                                          | Xi'an, China                             | Data collection                                         |                                                                                            |
| Huiling                           | Wang       |                       | M.D.             | Department of endocrinology, Affiliated Hospital of Shaanxi University of Trad Shenzhen Hospital itional Chinese Medicine              | Xianyang, China                          | Data collection                                         |                                                                                            |

## Supplemental Online Content: Nonauthor Collaborators

\*First name, last name, and suffix (if applicable) are required and will appear in PubMed.

| *First Name and Middle Initial(s) | *Last Name | *Suffix (eg, Jr, III) | Academic Degrees | Institution                                                                                            | Location (city, state/province, country) | Role or Contribution, eg, chair, principal investigator | Group (if more than 1 Group listed in the byline) and/or Subgroup (eg, Steering Committee) |
|-----------------------------------|------------|-----------------------|------------------|--------------------------------------------------------------------------------------------------------|------------------------------------------|---------------------------------------------------------|--------------------------------------------------------------------------------------------|
| Gangxin                           | Qin        |                       | M.M              | Department of endocrinology, Affiliated Hospital of Shaanxi University of Traditional Chinese Medicine | Xianyang, China                          | Data collection                                         |                                                                                            |
| Qiuju                             | Zhao       |                       | M.M              | Department of endocrinology, Affiliated Hospital of Shaanxi University of Traditional Chinese Medicine | Xianyang, China                          | Data collection                                         |                                                                                            |
| Lulu                              | Wang       |                       | M.M              | Department of endocrinology, Affiliated Hospital of Shaanxi University of Traditional Chinese Medicine | Xianyang, China                          | Data collection                                         |                                                                                            |
| Junting                           | Luo        |                       | M.M              | Department of endocrinology, Affiliated Hospital of Shaanxi University of Traditional Chinese Medicine | Xianyang, China                          | Data collection                                         |                                                                                            |
| Luyv                              | Liu        |                       | M.M              | Department of endocrinology, Affiliated Hospital of Shaanxi University of Traditional Chinese Medicine | Xianyang, China                          | Data collection                                         |                                                                                            |
| Li                                | Zhao       |                       | M.M              | Department of endocrinology, Affiliated Hospital of Shaanxi University of Traditional Chinese Medicine | Xianyang, China                          | Data collection                                         |                                                                                            |
| Wenjiao                           | Xie        |                       | M.M              | Department of endocrinology, Kunming Municipal Hospital of Traditional Chinese Medicine                | Kunming, China                           | Data collection                                         |                                                                                            |
| Xinlun                            | Cai        |                       | MB               | Department of endocrinology, Kunming Municipal Hospital of Traditional Chinese Medicine                | Kunming, China                           | Data collection                                         |                                                                                            |
| Gaohong                           | Qiao       |                       | MB               | Department of endocrinology, Sanmenxia Central Hospital                                                | Sanmenxia, China                         | Data collection                                         |                                                                                            |

## Supplemental Online Content: Nonauthor Collaborators

\*First name, last name, and suffix (if applicable) are required and will appear in PubMed.

| *First Name and Middle Initial(s) | *Last Name | *Suffix (eg, Jr, III) | Academic Degrees | Institution                                                                                       | Location (city, state/province, country) | Role or Contribution, eg, chair, principal investigator | Group (if more than 1 Group listed in the byline) and/or Subgroup (eg, Steering Committee) |
|-----------------------------------|------------|-----------------------|------------------|---------------------------------------------------------------------------------------------------|------------------------------------------|---------------------------------------------------------|--------------------------------------------------------------------------------------------|
| Aoran                             | Song       |                       | M.M              | Department of endocrinology, Tongliao City Horqin District First People's Hospital                | Tongliao, China                          | Data collection                                         |                                                                                            |
| Jianxiu                           | Li         |                       | MB               | Department of endocrinology, Hebei Cangzhou Hospital of Integrated Chinese and Western Medicine   | Cangzhou, China                          | Data collection                                         |                                                                                            |
| Wendan                            | Zhang      |                       | MB               | Department of endocrinology, Hebei Cangzhou Hospital of Integrated Chinese and Western Medicine   | Cangzhou, China                          | Data collection                                         |                                                                                            |
| Qiong                             | Wu         |                       | M.M              | Department of endocrinology, Hebei Cangzhou Hospital of Integrated Chinese and Western Medicine   | Cangzhou, China                          | Data collection                                         |                                                                                            |
| Yanan                             | Wang       |                       | M.M              | Department of endocrinology, Hebei Cangzhou Hospital of Integrated Chinese and Western Medicine   | Cangzhou, China                          | Data collection                                         |                                                                                            |
| Qijun                             | Fang       |                       | M.D.             | Department of Traditional Chinese Medicine, Nanjing Drum Tower Hospital                           | Nanjing, China                           | Data collection                                         |                                                                                            |
| Lijun                             | Yue        |                       | M.D.             | Department of Traditional Chinese Medicine, Nanjing Drum Tower Hospital                           | Nanjing, China                           | Data collection                                         |                                                                                            |
| Yuling                            | Zhang      |                       | MB               | Department of Traditional Chinese Medicine, Nanjing Drum Tower Hospital                           | Nanjing, China                           | Data collection                                         |                                                                                            |
| Li                                | Hu         |                       | M.M              | Department of endocrinology, The First Affiliated Hospital of Guangdong Pharmaceutical University | Guangzhou, China                         | Data collection                                         |                                                                                            |

## Supplemental Online Content: Nonauthor Collaborators

\*First name, last name, and suffix (if applicable) are required and will appear in PubMed.

| *First Name and Middle Initial(s) | *Last Name | *Suffix (eg, Jr, III) | Academic Degrees | Institution                                                                                         | Location (city, state/province, country) | Role or Contribution, eg, chair, principal investigator | Group (if more than 1 Group listed in the byline) and/or Subgroup (eg, Steering Committee) |
|-----------------------------------|------------|-----------------------|------------------|-----------------------------------------------------------------------------------------------------|------------------------------------------|---------------------------------------------------------|--------------------------------------------------------------------------------------------|
| Qin                               | You        |                       | MB               | Department of endocrinology, The First Affiliated Hospital of Anhui University of Chinese Medicine  | Anhui, China                             | Data collection                                         |                                                                                            |
| Li                                | Wang       |                       | M.M              | Department of endocrinology, Shenzhen Hospital (Futian) of Guangzhou University of Chinese Medicine | Shenzhen, China                          | Data collection                                         |                                                                                            |
| Siyu                              | Zhao       |                       | M.M              | Department of General Medicine, Baotou Clinical Medical College, Inner Mongolia Medical University  | Baotou, China                            | Data collection                                         |                                                                                            |
| Liwei                             | Zhang      |                       | M.M              | Department of General Medicine, Baotou Clinical Medical College, Inner Mongolia Medical University  | Baotou, China                            | Data collection                                         |                                                                                            |
| Hui                               | Guo        |                       | M.M              | Department of General Medicine, Baotou Clinical Medical College, Inner Mongolia Medical University  | Baotou, China                            | Data collection                                         |                                                                                            |
| Lina                              | Dai        |                       | M.M              | Department of General Medicine, Baotou Clinical Medical College, Inner Mongolia Medical University  | Baotou, China                            | Data collection                                         |                                                                                            |
| Wenjuan                           | Niu        |                       | MB               | Department of General Medicine, Baotou Clinical Medical College, Inner Mongolia Medical University  | Baotou, China                            | Data collection                                         |                                                                                            |
| Wei                               | Gao        |                       | M.M              | Traditional Chinese Medicine Department, Inner Mongolia Autonomous Region People's Hospital         | Huhehaote, China                         | Data collection                                         |                                                                                            |
| Minzhou                           | Li         |                       | M.D.             | Traditional Chinese Medicine Department, Inner Mongolia Autonomous Region People's Hospital         | Huhehaote, China                         | Data collection                                         |                                                                                            |

## Supplemental Online Content: Nonauthor Collaborators

\*First name, last name, and suffix (if applicable) are required and will appear in PubMed.

| *First Name and Middle Initial(s) | *Last Name | *Suffix (eg, Jr, III) | Academic Degrees | Institution                                                                                | Location (city, state/province, country) | Role or Contribution, eg, chair, principal investigator | Group (if more than 1 Group listed in the byline) and/or Subgroup (eg, Steering Committee) |
|-----------------------------------|------------|-----------------------|------------------|--------------------------------------------------------------------------------------------|------------------------------------------|---------------------------------------------------------|--------------------------------------------------------------------------------------------|
| Ruixia                            | Zhang      |                       | M.M              | Traditional Chinese Medicine Department,Inner Mongolia Autonomous Region People's Hospital | Huhehaote, China                         | Data collection                                         |                                                                                            |
| Yixuan                            | Liu        |                       | M.M              | Traditional Chinese Medicine Department,Inner Mongolia Autonomous Region People's Hospital | Huhehaote, China                         | Data collection                                         |                                                                                            |
| Jingwen                           | Wang       |                       | M.M              | Traditional Chinese Medicine Department,Inner Mongolia Autonomous Region People's Hospital | Huhehaote, China                         | Data collection                                         |                                                                                            |
| Congchao                          | Zhang      |                       | M.M              | Traditional Chinese Medicine Department,Inner Mongolia Autonomous Region People's Hospital | Huhehaote, China                         | Data collection                                         |                                                                                            |
| Siyuan                            | Li         |                       | M.M              | Traditional Chinese Medicine Department,Inner Mongolia Autonomous Region People's Hospital | Huhehaote, China                         | Data collection                                         |                                                                                            |
| Yurong                            | Feng       |                       | M.M              | Traditional Chinese Medicine Department,Inner Mongolia Autonomous Region People's Hospital | Huhehaote, China                         | Data collection                                         |                                                                                            |
| Yingran                           | Dai        |                       | M.M              | Traditional Chinese Medicine Department,Inner Mongolia Autonomous Region People's Hospital | Huhehaote, China                         | Data collection                                         |                                                                                            |
| Ren                               | Sa         |                       | M.M              | Traditional Chinese Medicine Department,Inner Mongolia Autonomous Region People's Hospital | Huhehaote, China                         | Data collection                                         |                                                                                            |

## Supplemental Online Content: Nonauthor Collaborators

\*First name, last name, and suffix (if applicable) are required and will appear in PubMed.

| *First Name and Middle Initial(s) | *Last Name | *Suffix (eg, Jr, III) | Academic Degrees | Institution                                                                                                        | Location (city, state/province, country) | Role or Contribution, eg, chair, principal investigator | Group (if more than 1 Group listed in the byline) and/or Subgroup (eg, Steering Committee) |
|-----------------------------------|------------|-----------------------|------------------|--------------------------------------------------------------------------------------------------------------------|------------------------------------------|---------------------------------------------------------|--------------------------------------------------------------------------------------------|
| Lili                              | Sang       |                       | M.M              | Geriatrics Department , Liaocheng People's Hospital Geriatrics Department                                          | Liaocheng. China                         | Data collection                                         |                                                                                            |
| Haiyan                            | Wang       |                       | M.M              | Geriatrics Department , Liaocheng People's Hospital Geriatrics Department                                          | Liaocheng. China                         | Data collection                                         |                                                                                            |
| Weiwei                            | Yin        |                       | M.M              | Geriatrics Department , Liaocheng People's Hospital Geriatrics Department                                          | Liaocheng. China                         | Data collection                                         |                                                                                            |
| Hong                              | Zhang      |                       | MB               | Geriatrics Department , Liaocheng People's Hospital Geriatrics Department                                          | Liaocheng. China                         | Data collection                                         |                                                                                            |
| Fengjun                           | Sun        |                       | MB               | Geriatrics Department , Liaocheng People's Hospital Geriatrics Department                                          | Liaocheng. China                         | Data collection                                         |                                                                                            |
| Li                                | Ma         |                       | M.M              | Department of Traditional Chinese medicine, The First Affiliated Hospital of Medical College of Shihezi University | Shihezi, China                           | Data collection                                         |                                                                                            |
| Junyong                           | Yang       |                       | M.M              | Department of Traditional Chinese medicine, The First Affiliated Hospital of Medical College of Shihezi University | Shihezi, China                           | Data collection                                         |                                                                                            |
| Xuanmin                           | Zhang      |                       | M.D.             | Department of Traditional Chinese medicine, The First Affiliated Hospital of Medical College of Shihezi University | Shihezi, China                           | Data collection                                         |                                                                                            |
| Xia                               | Gan        |                       | M.M              | Department of Traditional Chinese medicine, The First Affiliated Hospital of Medical College of Shihezi University | Shihezi, China                           | Data collection                                         |                                                                                            |

## Supplemental Online Content: Nonauthor Collaborators

\*First name, last name, and suffix (if applicable) are required and will appear in PubMed.

| *First Name and Middle Initial(s) | *Last Name | *Suffix (eg, Jr, III) | Academic Degrees | Institution                                                                                                        | Location (city, state/province, country) | Role or Contribution, eg, chair, principal investigator | Group (if more than 1 Group listed in the byline) and/or Subgroup (eg, Steering Committee) |
|-----------------------------------|------------|-----------------------|------------------|--------------------------------------------------------------------------------------------------------------------|------------------------------------------|---------------------------------------------------------|--------------------------------------------------------------------------------------------|
| Yang                              | Sheng      |                       | M.M              | Department of Traditional Chinese medicine, The First Affiliated Hospital of Medical College of Shihezi University | Shihezi, China                           | Data collection                                         |                                                                                            |
| Yun                               | Zhou       |                       | MB               | Department of Traditional Chinese medicine, The First Affiliated Hospital of Medical College of Shihezi University | Shihezi, China                           | Data collection                                         |                                                                                            |
| Junhu                             | Lu         |                       | M.M              | Department of Traditional Chinese medicine, The First Affiliated Hospital of Medical College of Shihezi University | Shihezi, China                           | Data collection                                         |                                                                                            |
| Tong                              | Xu         |                       | MB               | Department of Traditional Chinese medicine, The First Affiliated Hospital of Medical College of Shihezi University | Shihezi, China                           | Data collection                                         |                                                                                            |
| Haoran                            | Li         |                       | M.M              | Department of Traditional Chinese medicine, The First Affiliated Hospital of Medical College of Shihezi University | Shihezi, China                           | Data collection                                         |                                                                                            |
| Zhen                              | Li         |                       | M.M              | Department of Traditional Chinese medicine, The First Affiliated Hospital of Medical College of Shihezi University | Shihezi, China                           | Data collection                                         |                                                                                            |
| Xiaoxia                           | Pan        |                       | MB               | Department of Endocrinology, Fourth People's Hospital of Jinan City                                                | Jinan, China                             | Data collection                                         |                                                                                            |
| Li                                | Zhang      |                       | M.M              | Department of Endocrinology, Fourth People's Hospital of Jinan City                                                | Jinan, China                             | Data collection                                         |                                                                                            |



## Supplemental Online Content: Nonauthor Collaborators

\*First name, last name, and suffix (if applicable) are required and will appear in PubMed.

| *First Name and Middle Initial(s) | *Last Name | *Suffix (eg, Jr, III) | Academic Degrees | Institution                                                                     | Location (city, state/province, country) | Role or Contribution, eg, chair, principal investigator | Group (if more than 1 Group listed in the byline) and/or Subgroup (eg, Steering Committee) |
|-----------------------------------|------------|-----------------------|------------------|---------------------------------------------------------------------------------|------------------------------------------|---------------------------------------------------------|--------------------------------------------------------------------------------------------|
| Jialin                            | Han        |                       | M.D.             | Department of Endocrinology, Weifang Hospital of Traditional Chinese Medicine   | Weifang, China                           | Data collection                                         |                                                                                            |
| Acui                              | Yu         |                       | M.M              | Department of Geriatrics, Yantai Affiliated Hospital of Binzhou Medical College | Yantai, China                            | Data collection                                         |                                                                                            |
| Jingqing                          | Jing       |                       | M.M              | Department of Geriatrics, Yantai Affiliated Hospital of Binzhou Medical College | Yantai, China                            | Data collection                                         |                                                                                            |
| Li                                | Huang      |                       | M.M              | Department of Geriatrics, Yantai Affiliated Hospital of Binzhou Medical College | Yantai, China                            | Data collection                                         |                                                                                            |
| Xi                                | Chen       |                       | M.M              | Department of Geriatrics, Yantai Affiliated Hospital of Binzhou Medical College | Yantai, China                            | Data collection                                         |                                                                                            |
| Xuling                            | Wang       |                       | M.M              | Department of endocrinologyHeilongjiang Academy Tradition of Chinese Medicine   | Harbin, China                            | Data collection                                         |                                                                                            |
| Jilai                             | Shi        |                       | M.M              | Department of Endocrinology, Shandong Provincial Hospital of Traditional        | Jinan, China                             | Data collection                                         |                                                                                            |
| Bingyan                           | Wang       |                       | M.M              | Department of Endocrinology, Shandong Provincial Hospital of Traditional        | Jinan, China                             | Data collection                                         |                                                                                            |
| Guanghai                          | Sun        |                       | M.M              | Department of Endocrinology, Shandong Provincial Hospital of Traditional        | Jinan, China                             | Data collection                                         |                                                                                            |
| Kaimin                            | Li         |                       | M.M              | Department of Endocrinology, Shandong Provincial Hospital of Traditional        | Jinan, China                             | Data collection                                         |                                                                                            |

## Supplemental Online Content: Nonauthor Collaborators

\*First name, last name, and suffix (if applicable) are required and will appear in PubMed.

| *First Name and Middle Initial(s) | *Last Name | *Suffix (eg, Jr, III) | Academic Degrees | Institution                                                                                              | Location (city, state/province, country) | Role or Contribution, eg, chair, principal investigator | Group (if more than 1 Group listed in the byline) and/or Subgroup (eg, Steering Committee) |
|-----------------------------------|------------|-----------------------|------------------|----------------------------------------------------------------------------------------------------------|------------------------------------------|---------------------------------------------------------|--------------------------------------------------------------------------------------------|
| Tingting                          | Zhou       |                       | M.M              | Department of endocrinology, Hebei Yiling Hospital                                                       | Shijiazhuang, China                      | Data collection                                         |                                                                                            |
| Mengying                          | Shi        |                       | M.M              | Department of Traditional Chinese medicine, Shijiazhuang 2nd Hospital                                    | Shijiazhuang, China                      | Data collection                                         |                                                                                            |
| Hongli                            | Liu        |                       | M.D.             | Department of Traditional Chinese medicine, Shijiazhuang 2nd Hospital                                    | Shijiazhuang, China                      | Data collection                                         |                                                                                            |
| Xueling                           | Sun        |                       | B.S              | Department of endocrinology, Tangshan Gongren Hospital                                                   | Tangshan, China                          | Data collection                                         |                                                                                            |
| Hewei                             | Zhang      |                       | MB               | Department of endocrinology, Tangshan Gongren Hospital                                                   | Tangshan, China                          | Data collection                                         |                                                                                            |
| Wenhui                            | Hong       |                       | M.M              | Department of endocrinology, Beijing Daxing District Hospital of Integrated Chinese and Western Medicine | Beijing, China                           | Data collection                                         |                                                                                            |
| Nan                               | Huang      |                       | M.M              | Department of endocrinology, Beijing Daxing District Hospital of Integrated Chinese and Western Medicine | Beijing, China                           | Data collection                                         |                                                                                            |
| Xiufen                            | Chen       |                       | M.M              | Department of endocrinology, Beijing Daxing District Hospital of Integrated Chinese and Western Medicine | Beijing, China                           | Data collection                                         |                                                                                            |
| Jinxiang                          | Zheng      |                       | M.M              | Department of endocrinology, Beijing Daxing District Hospital of Integrated Chinese and Western Medicine | Beijing, China                           | Data collection                                         |                                                                                            |
| Yongjuan                          | Juan       |                       | M.M              | Department of endocrinology, Beijing Daxing District Hospital of Integrated Chinese and Western Medicine | Beijing, China                           | Data collection                                         |                                                                                            |

## Supplemental Online Content: Nonauthor Collaborators

\*First name, last name, and suffix (if applicable) are required and will appear in PubMed.

| *First Name and Middle Initial(s) | *Last Name | *Suffix (eg, Jr, III) | Academic Degrees | Institution                                                                                                      | Location (city, state/province, country) | Role or Contribution, eg, chair, principal investigator | Group (if more than 1 Group listed in the byline) and/or Subgroup (eg, Steering Committee) |
|-----------------------------------|------------|-----------------------|------------------|------------------------------------------------------------------------------------------------------------------|------------------------------------------|---------------------------------------------------------|--------------------------------------------------------------------------------------------|
| Rongrong                          | Zhou       |                       | M.M              | Department of endocrinology, Guang'anmen Hospital China Academy of Chinese Medical Sciences                      | Beijing, China                           | Data collection                                         |                                                                                            |
| Huidan                            | Wang       |                       | B.S              | Department of endocrinology, Central Hospital of Jinzhou                                                         | Jinzhou, China                           | Data collection                                         |                                                                                            |
| Chunxue                           | Zang       |                       | M.D.             | Department of endocrinology, Affiliated Hospital of Liaoning University of Traditional Chinese Medicine          | Shenyang, China                          | Data collection                                         |                                                                                            |
| Yiwen                             | Lai        |                       | M.D.             | Department of endocrinology, Affiliated Hospital of Liaoning University of Traditional Chinese Medicine          | Shenyang, China                          | Data collection                                         |                                                                                            |
| Zedong                            | Peng       |                       | M.M              | Department of endocrinology, Affiliated Hospital of Liaoning University of Traditional Chinese Medicine          | Shenyang, China                          | Data collection                                         |                                                                                            |
| Ruyu                              | Chen       |                       | M.M              | Department of endocrinology, Affiliated Hospital of Liaoning University of Traditional Chinese Medicine          | Shenyang, China                          | Data collection                                         |                                                                                            |
| Xinhui                            | Liu        |                       | M.M              | Department of endocrinology, Affiliated Hospital of Liaoning University of Traditional Chinese Medicine          | Shenyang, China                          | Data collection                                         |                                                                                            |
| Mengjie                           | Cai        |                       | M.M              | Department of Endocrinology, Shuguang Hospital Affiliated to Shanghai University of Traditional Chinese Medicine | Shanghai, China                          | Data collection                                         |                                                                                            |

Supplemental Online Content: Nonauthor Collaborators

\*First name, last name, and suffix (if applicable) are required and will appear in PubMed.

| <b>*First Name and Middle Initial(s)</b> | <b>*Last Name</b> | <b>*Suffix (eg, Jr, III)</b> | Academic Degrees | Institution                                                                                                      | Location (city, state/province, country) | Role or Contribution, eg, chair, principal investigator | Group (if more than 1 Group listed in the byline) and/or Subgroup (eg, Steering Committee) |
|------------------------------------------|-------------------|------------------------------|------------------|------------------------------------------------------------------------------------------------------------------|------------------------------------------|---------------------------------------------------------|--------------------------------------------------------------------------------------------|
| Xu                                       | Han               |                              | M.D.             | Department of Endocrinology, Shuguang Hospital Affiliated to Shanghai University of Traditional Chinese Medicine | Shanghai, China                          | Data collection                                         |                                                                                            |
