# Supplementary material for: Jinlida for Diabetes Prevention in Impaired Glucose Tolerance and Multiple Metabolic Abnormalities: The FOCUS Randomized Clinical Trial
Source: PubMed Central journal article supplement (PMC11148787; doi:10.1001/jamainternmed.2024.1190), 2024-06-03
Supplement: jamainternmed-e241190-s004.pdf [file jamainternmed-e241190-s004.pdf]

## Data Sharing Statement

Ji. Jinlida for Diabetes Prevention in Impaired Glucose Tolerance and Multiple Metabolic Abnormalities. *JAMA Intern Med.* Published June 03, 2024.

doi:10.1001/jamainternmed.2024.1190

### Data

**Data available:** Yes

**Data types:** Deidentified participant data

**How to access data:** [jzhjiazhenhua@163.com](mailto:jzhjiazhenhua@163.com)

**When available:** With publication

### Supporting Documents

**Document types:** Statistical/analytic code, Informed consent form

**How to access documents:** [jzhjiazhenhua@163.com](mailto:jzhjiazhenhua@163.com)

**When available:** With publication

### Additional Information

**Who can access the data:** [jzhjiazhenhua@163.com](mailto:jzhjiazhenhua@163.com)

**Types of analyses:** for a specified purpose

**Mechanisms of data availability:** with investigator support
